# Supplementary material for: Thiol-responsive hydrogel scaffolds for rapid change in thermoresponsiveness
Source: Royal Society of Chemistry journal article supplement (doi:10.1039/c3ra43841d), 2013-12-03

## Supporting Information

### Thiol-responsive hydrogel scaffolds for rapid change in thermoresponsiveness

Samuel Aleksanian, Yifen Wen, Nicky Chan, and Jung Kwon Oh\*

Department of Chemistry and Biochemistry and Center for Nanoscience Research, Concordia University, Montreal, Quebec, Canada H4B 1R6

**Figure S1.** Kinetic plot (A) and evolution of molecular weight and molecular weight distribution with conversion (B) for AGET ATRP of MEO<sub>2</sub>MA in the presence of PEO-Br macroinitiator in DMF at 47 °C. Conditions: [MEO<sub>2</sub>MA]<sub>0</sub>/[PEO-Br]<sub>0</sub>/[CuBr<sub>2</sub>]<sub>0</sub>/[bpy]<sub>0</sub> = 500/1/3/6; [Sn(Oct)<sub>2</sub>]<sub>0</sub>/[CuBr<sub>2</sub>]<sub>0</sub> = 0.7/1; MEO<sub>2</sub>MA/DMF = 1.5/1 wt/wt. The dotted lines in (A) are linear fits, and the straight lines in (B) are the theoretically predicted molecular weight over conversion.

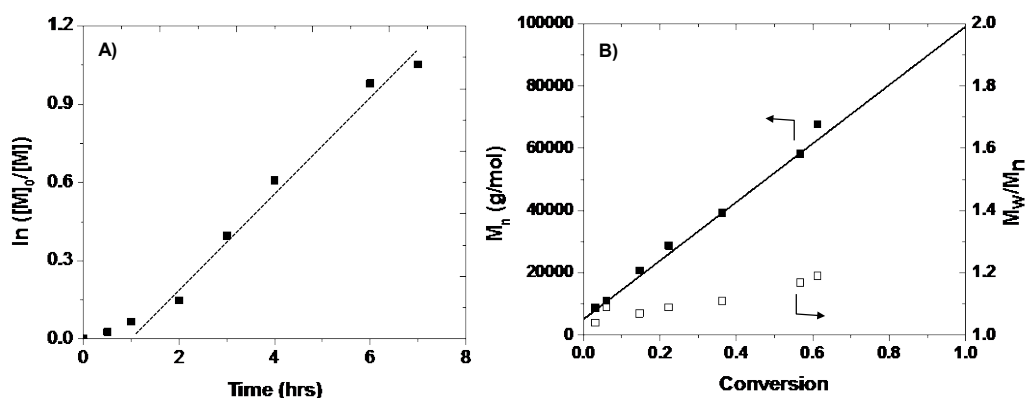

**Figure S2.** GPC traces of PEO-b-PMEO<sub>2</sub>MA block copolymers, compared with that of PEO-Br macroinitiator. Molecular weights of PEO-b-PMEO<sub>2</sub>MA:  $M_n$  = 28.8 kg/mol,  $M_w/M_n$  = 1.09 (1),  $M_n$  = 39.2 kg/mol,  $M_w/M_n$  = 1.11 (2), and  $M_n$  = 58.2 kg/mol,  $M_w/M_n$  = 1.17 (3).

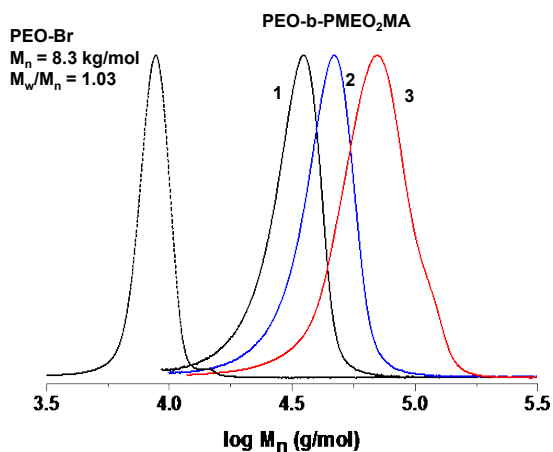

Figure S3. Temperature-dependent viscoelastic properties of ssH2 (a), ssH4 (b), and ssH6 gels (c).

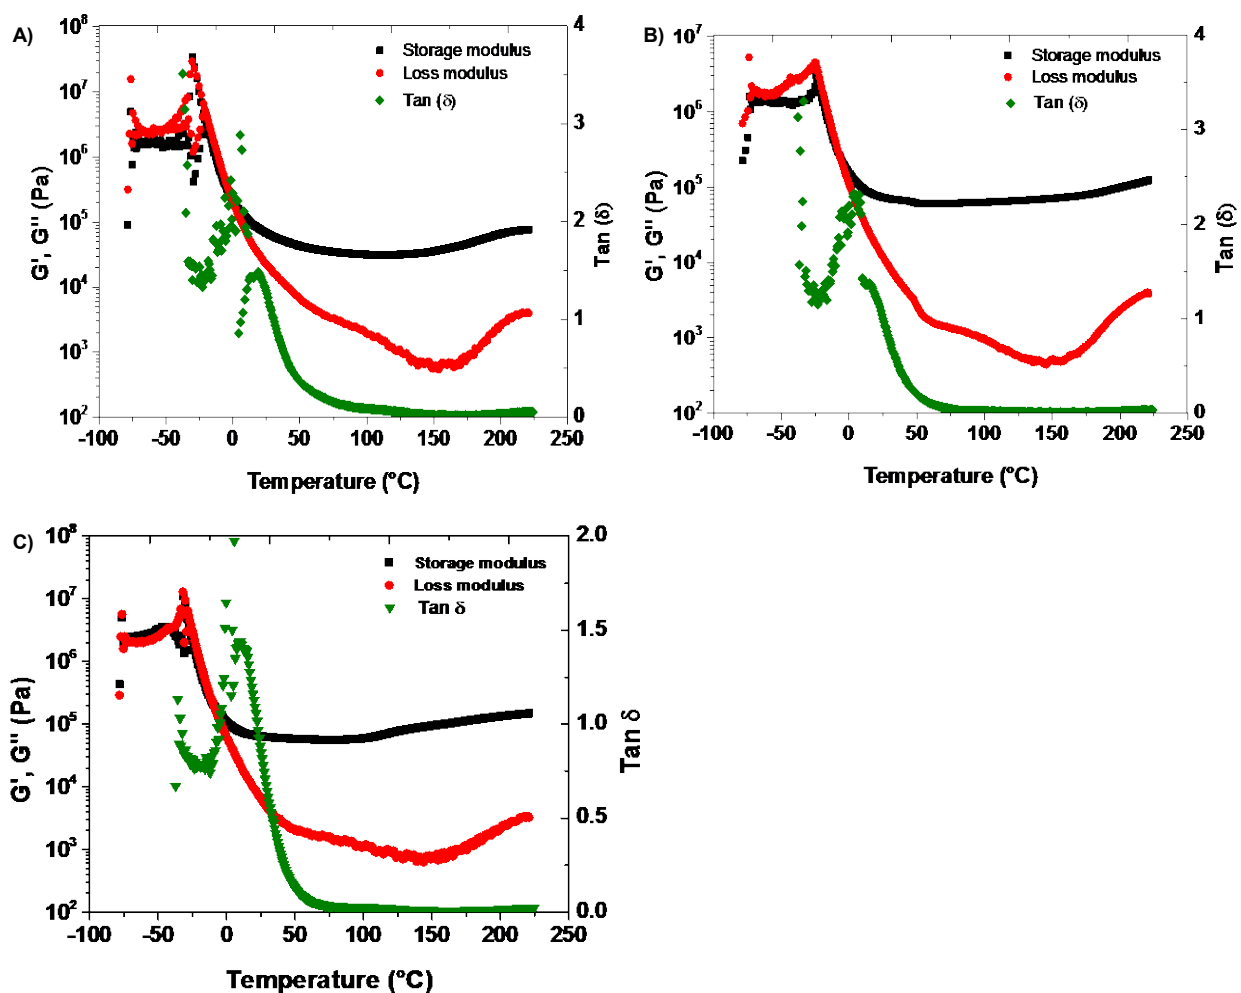

**Figure S4.** Temperature dependence of normalized light scattering intensity by DLS for 3 mg/mL aqueous solutions of PEO-b-PMEO<sub>2</sub>MA.

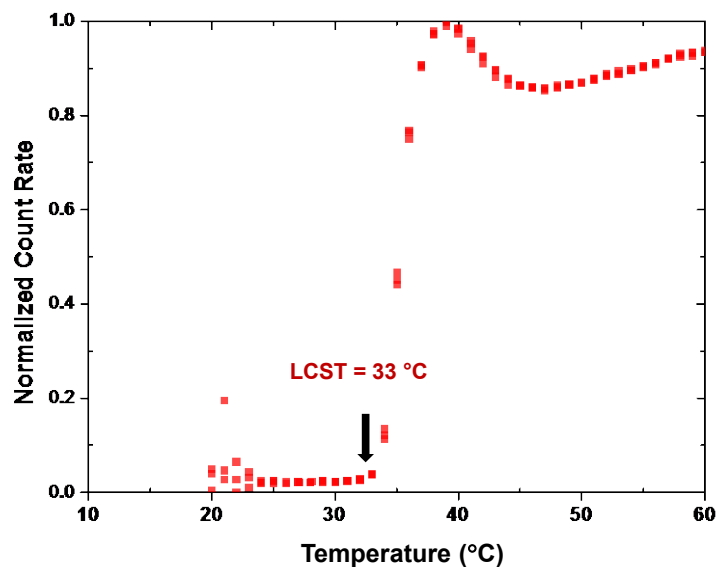

**Figure S5.** DSC thermograms of ssH2 and ssH6 hydrogels.

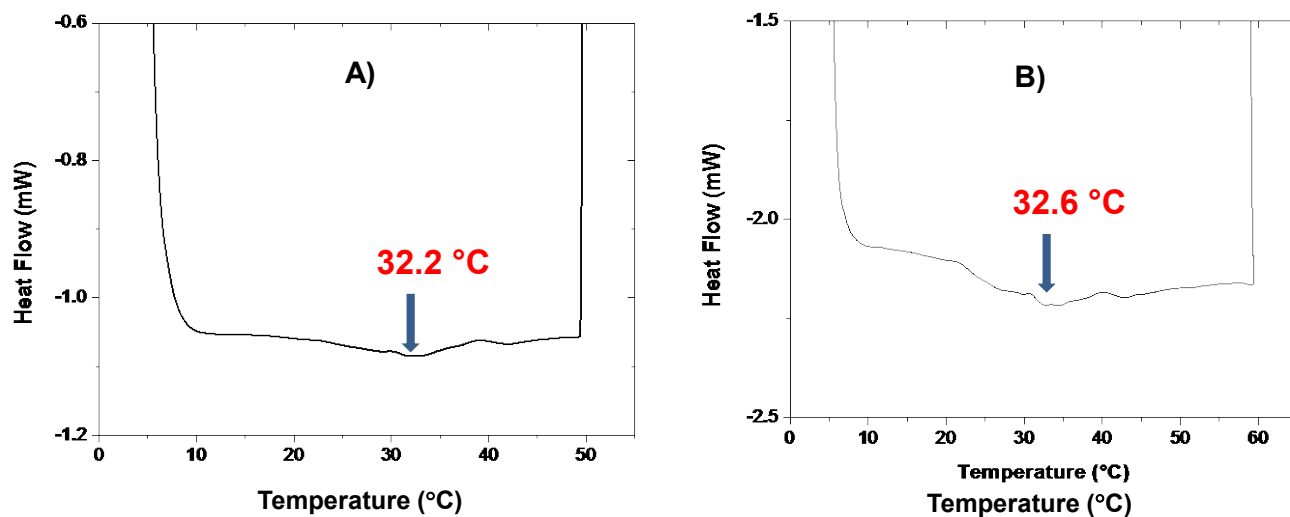

**Figure S6.** Absorbance vs concentration of R6G to determined its extinction coefficient in aqueous buffer solution at pH = 6.

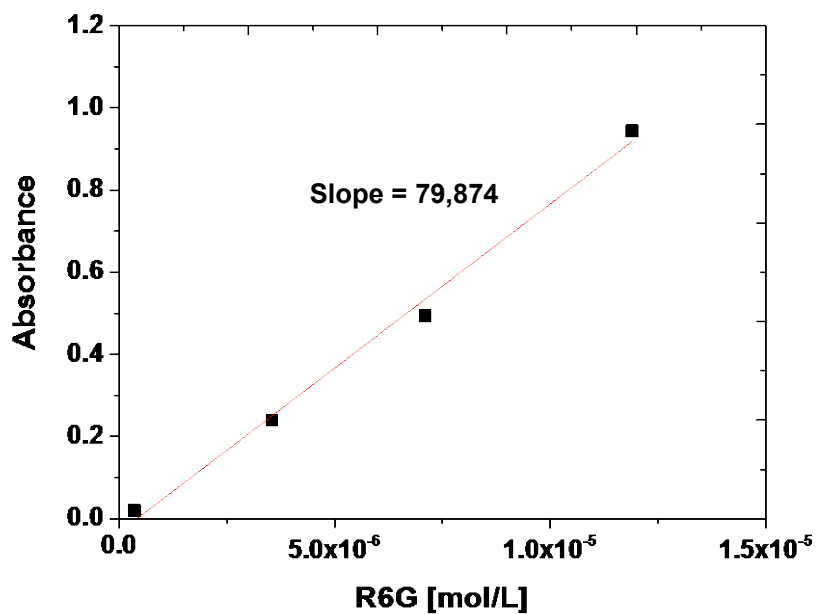

**Figure S7.** Evolution of absorbance of R6G released from thermoresponsive hydrogels in aqueous buffer solution at pH = 6 at 45 °C.

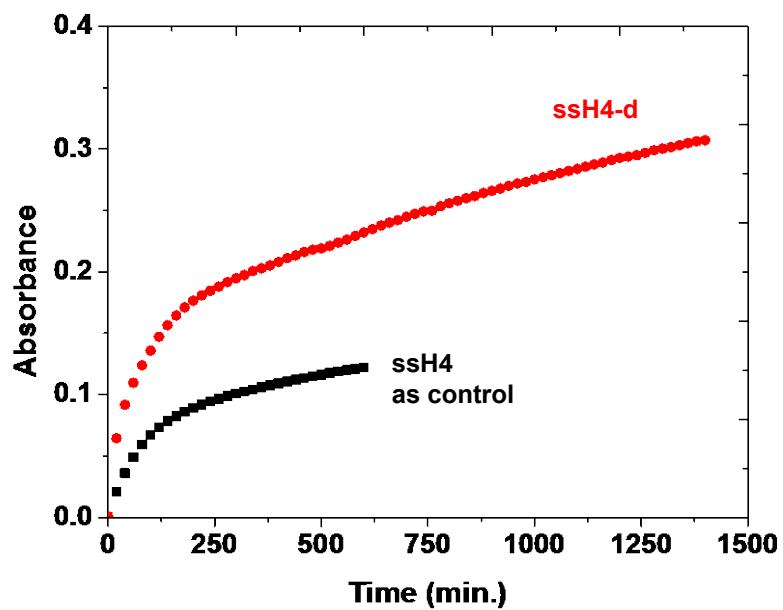

Supplement: c3ra43841d.pdf [file c3ra43841d.pdf]
